# Supplementary material for: Climate effects on vegetation vitality at the treeline of boreal forests of Mongolia
Source: Copernicus journal article supplement (doi:10.5194/bg-15-1319-2018), 2018-03-05
Supplement: Supplementary file 1 [file bg-15-1319-2018-supplement.zip]

Archive with 5 entries (5 files):
- Figure S2.tif
- GIS-data.zip
- Figure S1.tif
- Figure S3.tif
- bg-15-1319-2018-supplement-title-page.pdf
