# Supplementary material for: Climate effects on vegetation vitality at the treeline of boreal forests of Mongolia
Source: Copernicus journal article supplement (doi:10.5194/bg-15-1319-2018), 2018-03-05
Supplement: Supplementary file 1 [file bg-15-1319-2018-supplement.zip › bg-15-1319-2018-supplement-title-page.pdf]

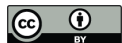

## *Supplement of*

# **Climate effects on vegetation vitality at the treeline of boreal forests of Mongolia**

**Michael Klinge et al.**

*Correspondence to:* Michael Klinge ([mklinge1@gwdg.de](mailto:mklinge1@gwdg.de))

- [bg-15-1319-2018-supplement-title-page.pdf](#)
- [Figure S1.tif](#)
- [Figure S2.tif](#)
- [Figure S3.tif](#)
- [GIS-data.zip](#)

The copyright of individual parts of the supplement might differ from the CC BY 3.0 License.
