# Supplementary figures and images for: Climate effects on vegetation vitality at the treeline of boreal forests of Mongolia
Source: Copernicus journal article supplement (doi:10.5194/bg-15-1319-2018), 2018-03-05

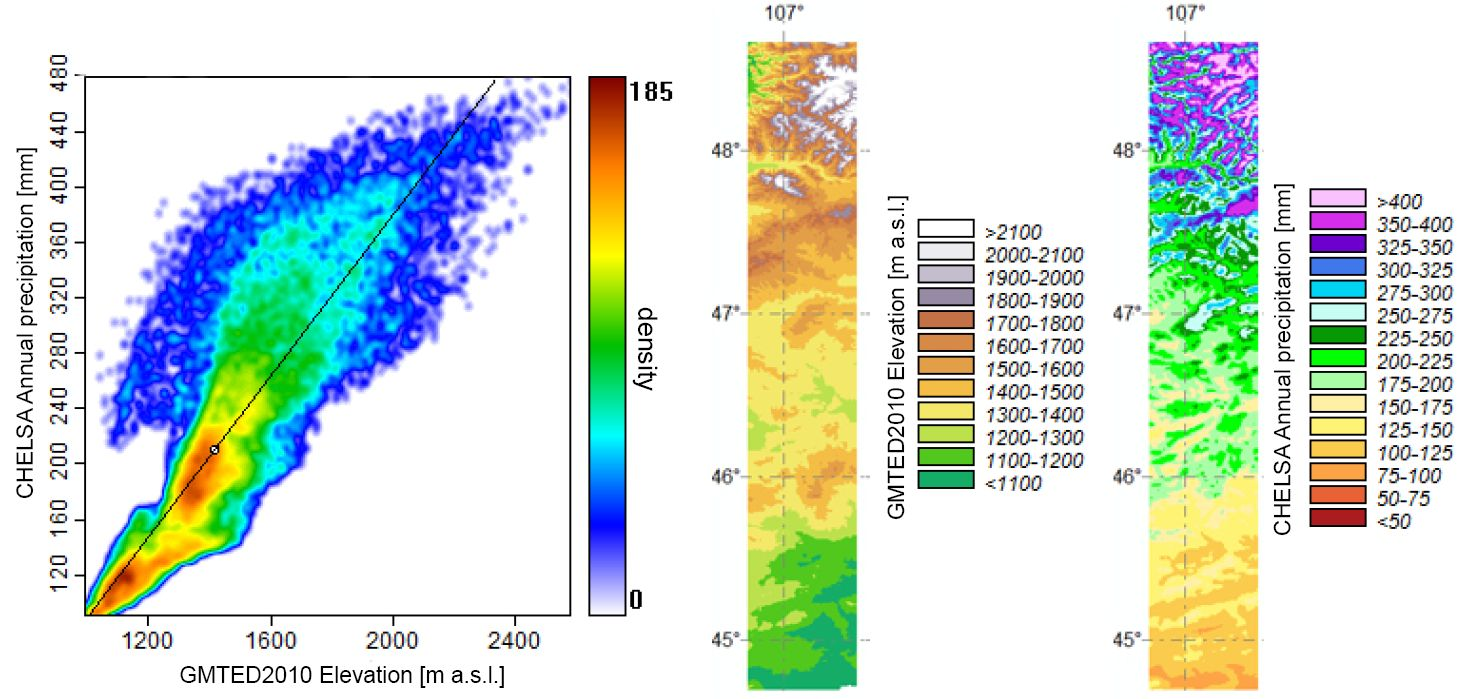

Supplement: Supplementary file 1 [file bg-15-1319-2018-supplement.zip › Figure S2.tif]

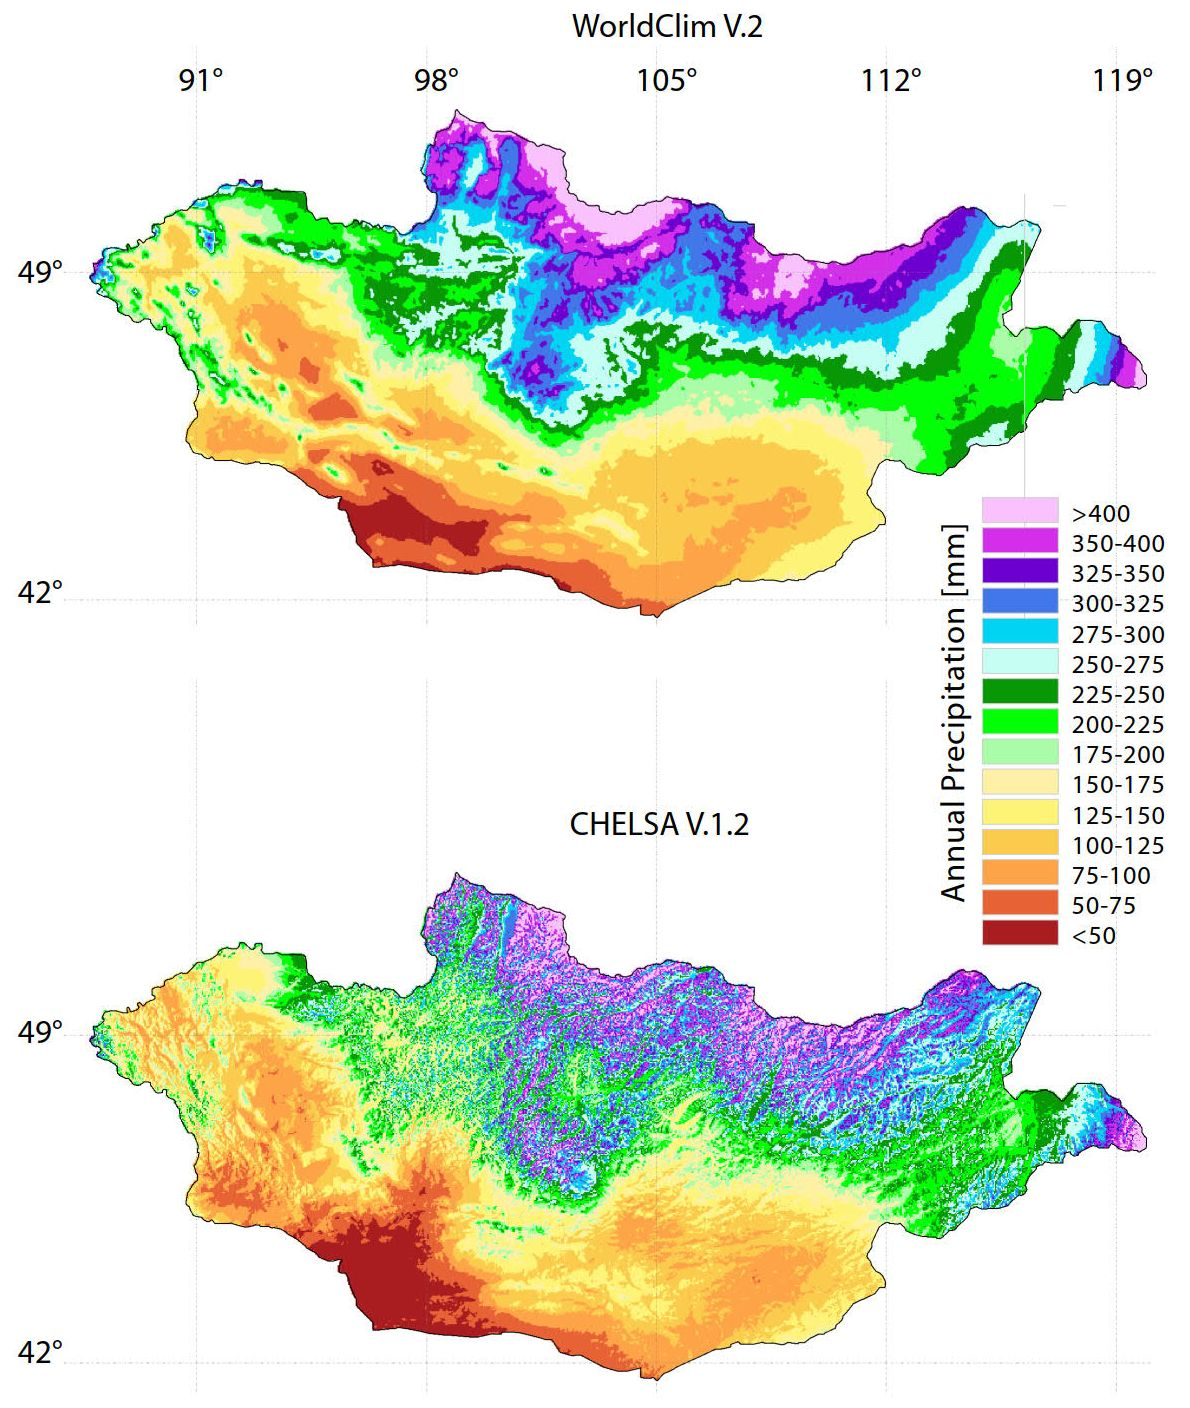

Supplement: Supplementary file 1 [file bg-15-1319-2018-supplement.zip › Figure S1.tif]

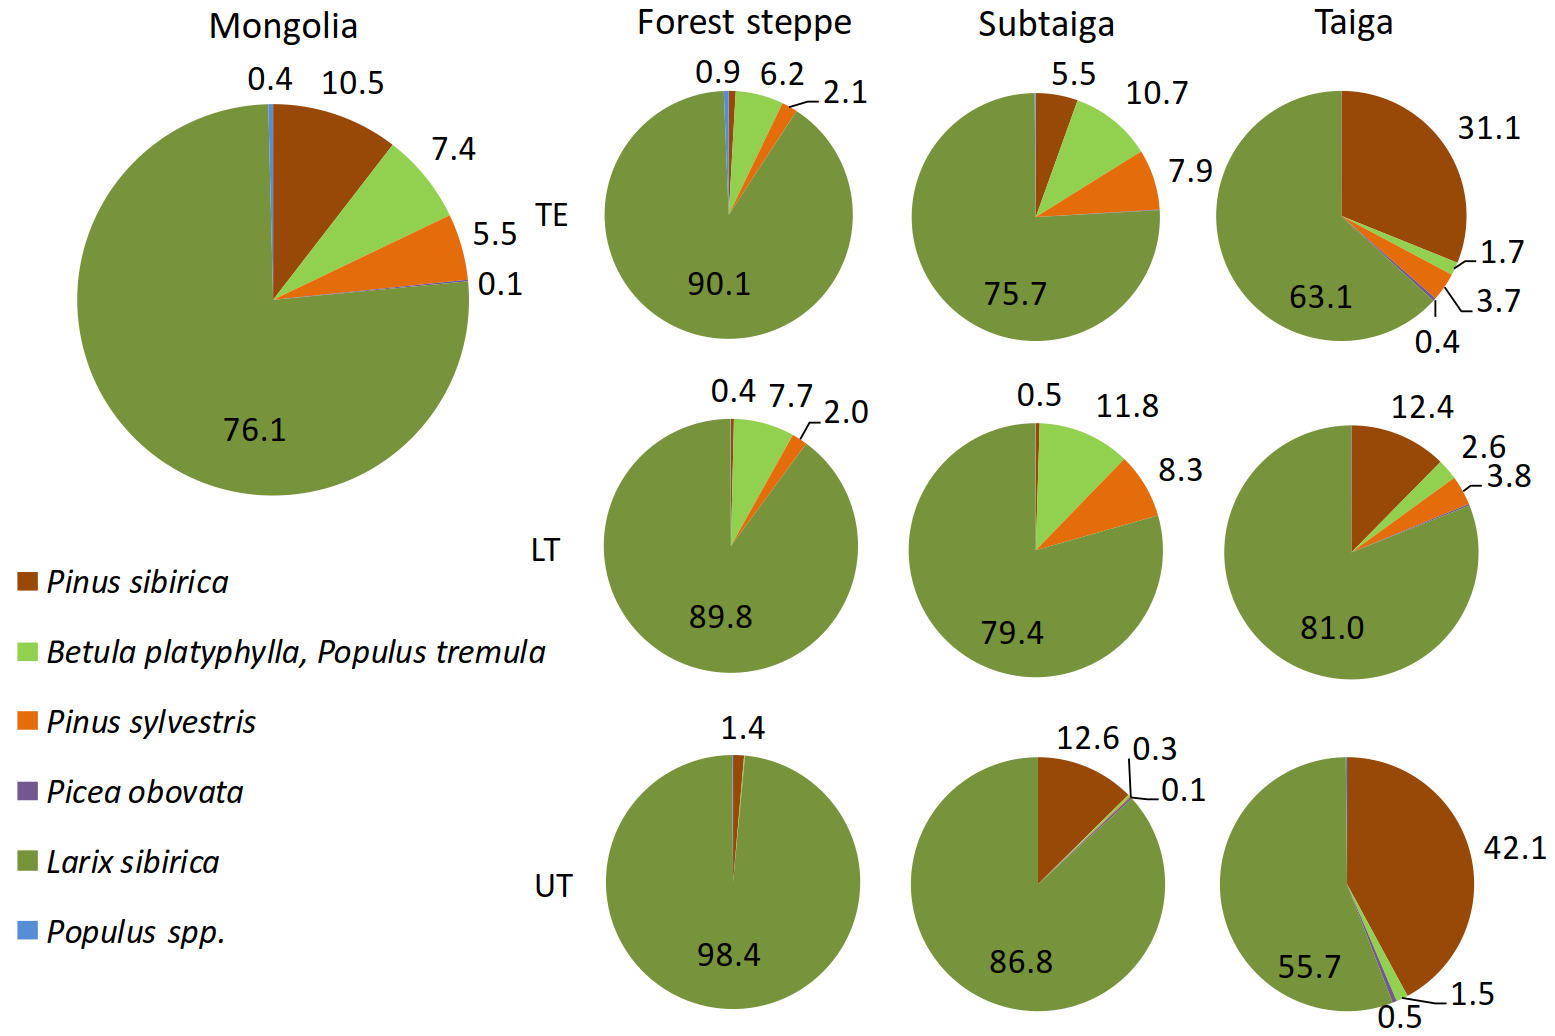

Supplement: Supplementary file 1 [file bg-15-1319-2018-supplement.zip › Figure S3.tif]
